# Supplementary material
Source: PubMed Central journal article supplement (PMC2048723)

S1.

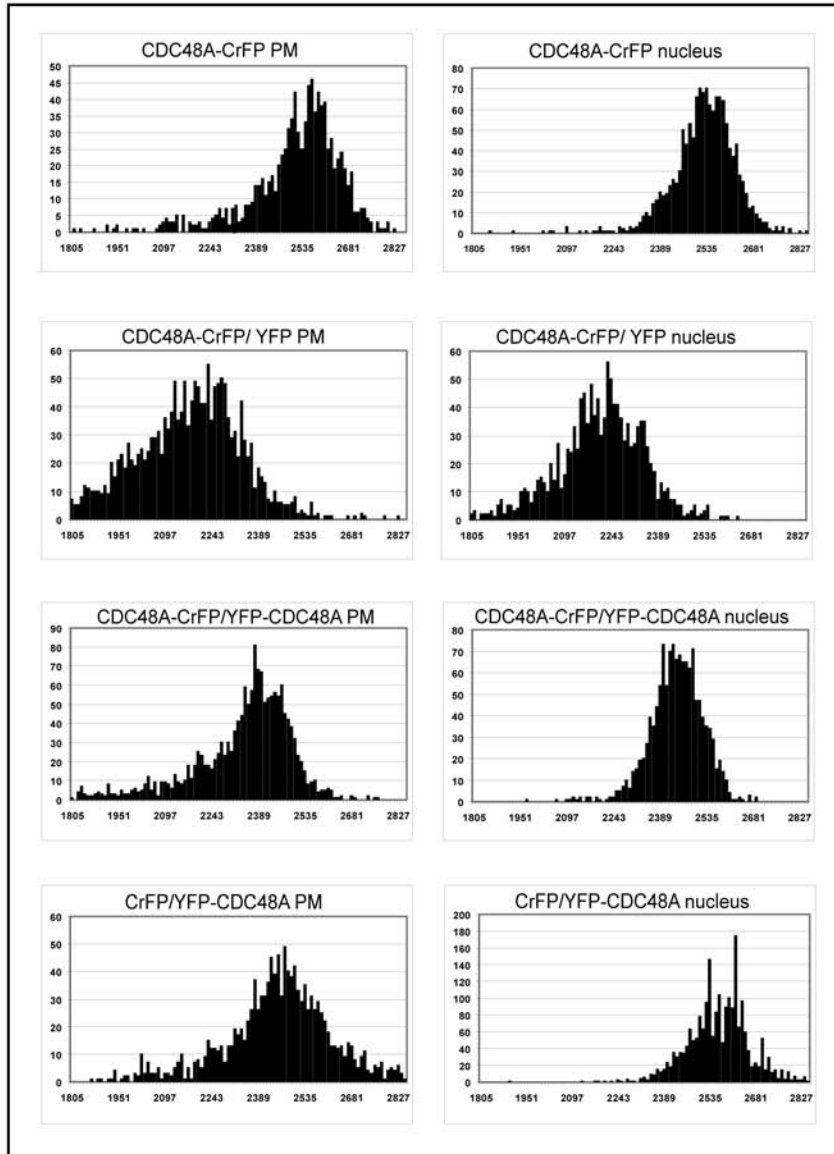

S2.

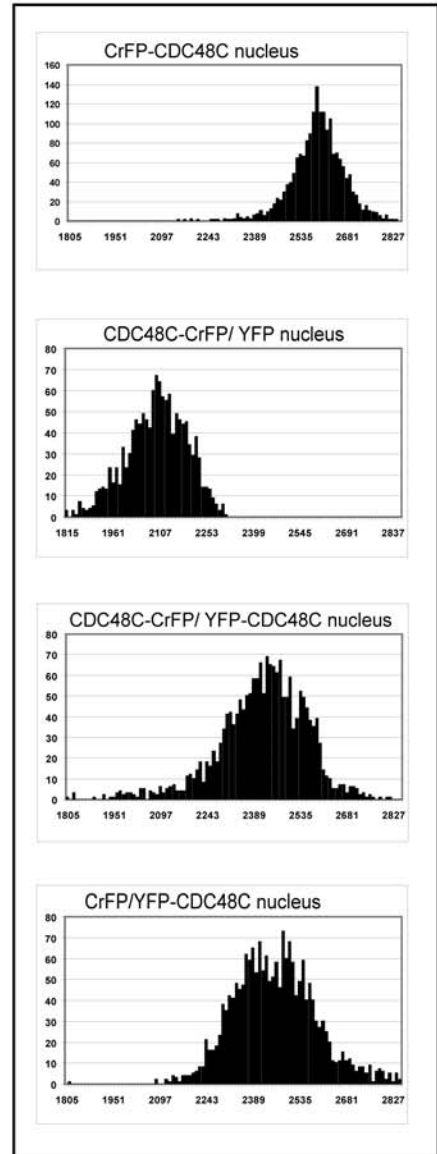

S3.

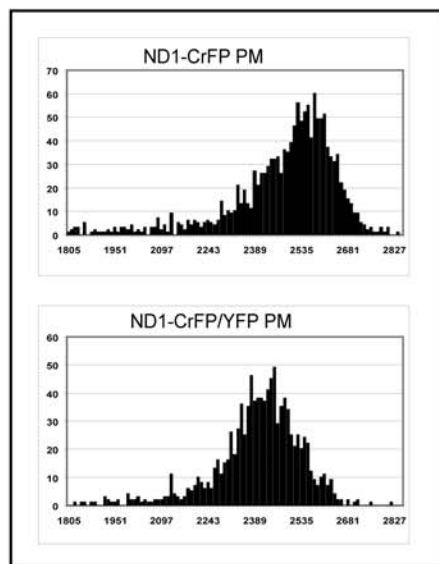

Horizontal: Lifetime in ps.  
Vertical: number of pixels per lifetime.

Supplement: plntphys_pp.107.103986_1.pdf [file plntphys_pp.107.103986_1.pdf]
